# Supplementary material for: A Unique Mutational Spectrum of MLC1 in Korean Patients With Megalencephalic Leukoencephalopathy With Subcortical Cysts: p.Ala275Asp Founder Mutation and Maternal Uniparental Disomy of Chromosome 22
Source: PubMed Central journal article supplement — Ann Lab Med. 2017 Aug 16;37(6):516–21. doi: 10.3343/alm.2017.37.6.516 (PMC5587825; doi:10.3343/alm.2017.37.6.516), 2017-08-16
Supplement: alm-37-516-s001.pdf [file alm-37-516-s001.pdf]

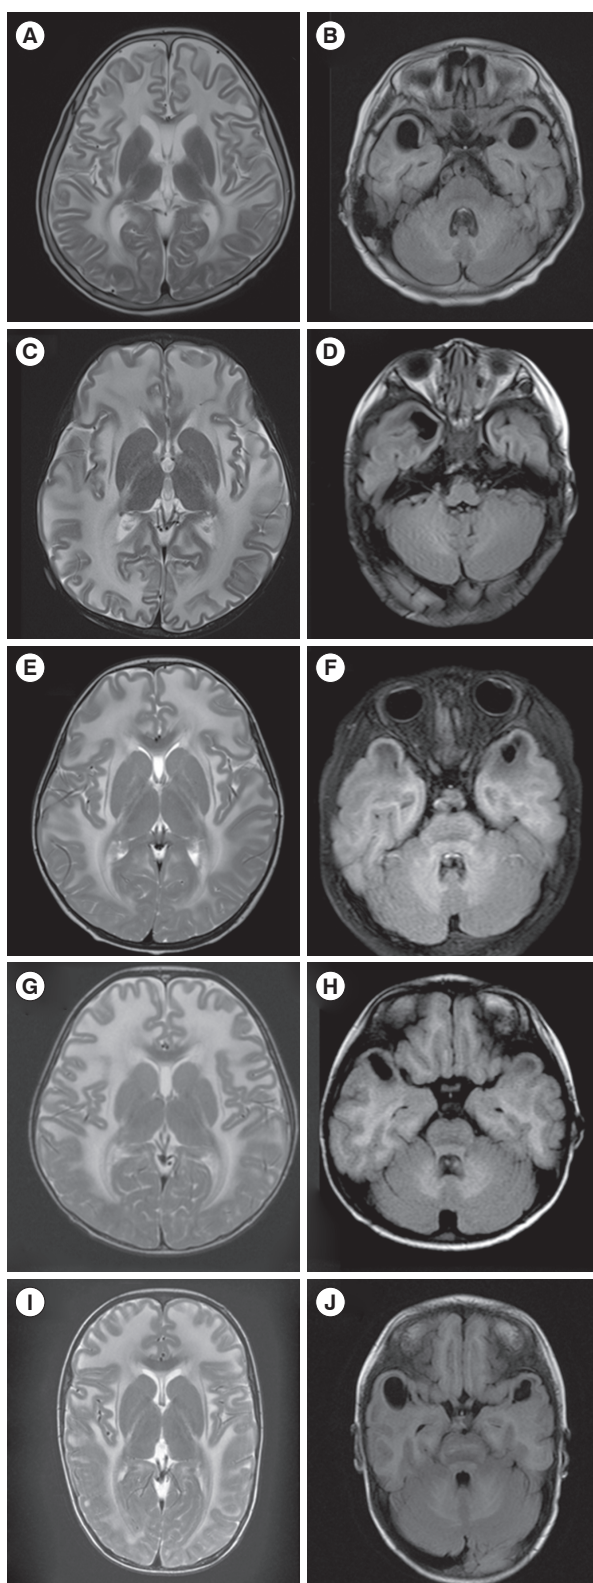

**Supplemental Data Fig. S1.** Brain magnetic resonance images of the five patients in this study. All five patients showed diffuse high signal intensity in cerebral white matter on T2-weighted axial images (on the left panel). Subcortical cysts in the anterior temporal lobes were also present in T1-weighted axial images (on the right panel). (A, B) Patient 1 (6 yr), (C, D) Patient 2 (1 yr 9 months), (E, F) Patient 3 (2 yr), (G, H) Patient 4 (2 yr), and (I, J) Patient 5 (3 yr).
