# Supplementary material for: A Unique Mutational Spectrum of MLC1 in Korean Patients With Megalencephalic Leukoencephalopathy With Subcortical Cysts: p.Ala275Asp Founder Mutation and Maternal Uniparental Disomy of Chromosome 22
Source: PubMed Central journal article supplement — Ann Lab Med. 2017 Aug 16;37(6):516–21. doi: 10.3343/alm.2017.37.6.516 (PMC5587825; doi:10.3343/alm.2017.37.6.516), 2017-08-16
Supplement: alm-37-516-s002.pdf [file alm-37-516-s002.pdf]

**Supplemental Data Table S1.** Interpretation of three putative sequence variants based on the American College of Medical Genetics and Genomics and the Association for Molecular Pathology criteria

| Sequence variant                   | Evidence of pathogenicity |        |          |            | Classification |
|------------------------------------|---------------------------|--------|----------|------------|----------------|
|                                    | Very strong               | Strong | Moderate | Supporting |                |
| c.824G>A (p.Ala275Asp)             |                           | PS3    | PM2, PM3 | PP4, PP5   | Pathogenic     |
| c.135delC (p.Cys46Alafs*12)        | PVS1                      |        | PM2, PM3 | PP4, PP5   | Pathogenic     |
| c.337_353delinsG (p.Ile113Glyfs*4) | PVS1                      |        | PM2, PM3 | PP4, PP5   | Pathogenic     |
